# Supplementary material for: Atmospheric teleconnection processes linking winter air stagnation and haze extremes in China with regional Arctic sea ice decline
Source: Copernicus journal article supplement (doi:10.5194/acp-20-4999-2020), 2020-04-28
Supplement: Supplementary file 1 [file acp-20-4999-2020-supplement.pdf]

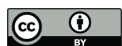

*Supplement of*

## **Atmospheric teleconnection processes linking winter air stagnation and haze extremes in China with regional Arctic sea ice decline**

**Yufei Zou et al.**

*Correspondence to:* Yufei Zou (yufei.zou@pnnl.gov) and Yuhang Wang (yuhang.wang@eas.gatech.edu)

The copyright of individual parts of the supplement might differ from the CC BY 4.0 License.

- 1 **Supplement**
- 2 **Table S1-S5**
- 3 **Figure S1-S10**
- 4 **Reference**

5 **Table S1. The 8 CMIP6 models used in this study**

| Model<br>Name    | Modeling Center                                                                                    | Institute ID            | Experiment ID                                                            | Ensemble<br>Member |
|------------------|----------------------------------------------------------------------------------------------------|-------------------------|--------------------------------------------------------------------------|--------------------|
| CAMS-<br>CSM1-0  | Chinese Academy of<br>Meteorological<br>Sciences                                                   | CAMS                    | Historical (Rong, 2019a)<br>+ssp585 (Rong, 2019b)                        | r1i1p1f1           |
| CESM2            | National Center for<br>Atmospheric Research                                                        | NCAR                    | Historical (Danabasoglu et al.,<br>2019) +ssp585 (Danabasoglu,<br>2019a) | r1i1p1f1           |
| CESM2-<br>WACCM  | National Center for<br>Atmospheric Research                                                        | NCAR                    | Historical (Danabasoglu,<br>2019b) +ssp585 (Danabasoglu,<br>2019c)       | r1i1p1f1           |
| CanESM5          | Canadian Centre for<br>Climate Modeling and<br>Analysis                                            | CCCma                   | Historical (CCCma, 2019a)<br>+ssp585 (CCCma, 2019b)                      | r1i1p1f1           |
| EC-Earth3        | The European EC-<br>Earth consortium                                                               | EC-Earth-<br>Consortium | Historical (EC-Earth, 2019a)<br>+ssp585 (EC-Earth, 2019b)                | r1i1p1f1           |
| GFDL-CM4         | National Oceanic and<br>Atmospheric<br>Administration,<br>Geophysical Fluid<br>Dynamics Laboratory | NOAA-<br>GFDL           | Historical (Guo et al., 2018a)<br>+ssp585 (Guo et al., 2018b)            | r1i1p1f1           |
| IPSL-<br>CM6A-LR | Institute Pierre-Simon<br>Laplace                                                                  | IPSL                    | Historical (Boucher, et al.,<br>2018) +ssp585 (Boucher, et al.,<br>2019) | r1i1p1f1           |

|        |                                   |       |                                                                               |          |
|--------|-----------------------------------|-------|-------------------------------------------------------------------------------|----------|
| MIROC6 | JAMSTEC, AORI,<br>NIES, and R-CCS | MIROC | Historical (Tatebe and<br>Watanabe, 2018) +ssp585<br>(Shiogama, et al., 2019) | r1i1p1f1 |
|--------|-----------------------------------|-------|-------------------------------------------------------------------------------|----------|

**Table S2. The statistical properties of the MCA\_Z500 and ECP\_PPI indices in the WACCM experiments**

|                        | CTRL |       | SENSall |       | SENSr1 |       | SENSr2 |       | SENSr3 |       |
|------------------------|------|-------|---------|-------|--------|-------|--------|-------|--------|-------|
| Variables              | Z500 | PPI   | Z500    | PPI   | Z500   | PPI   | Z500   | PPI   | Z500   | PPI   |
| Mean                   | 0.0  | 0.0   | 0.01    | -0.06 | -0.07  | -0.13 | 0.01   | 0.03  | 0.01   | -0.02 |
| Std                    | 0.50 | 0.44  | 0.54    | 0.49  | 0.51   | 0.43  | 0.54   | 0.54  | 0.53   | 0.46  |
| Skewness               | 0.17 | -0.13 | -0.66   | -0.18 | -0.13  | 0.24  | 0.73   | 0.56  | -0.39  | -0.32 |
| Kurtosis               | 0.07 | -0.78 | 0.27    | 0.55  | -0.04  | -0.52 | 0.48   | -0.38 | -0.35  | -0.31 |
| p-value <sup>(a)</sup> | 0.51 | 0.21  | 0.01    | 0.21  | 1.00   | 0.39  | 0.01   | 0.01  | 0.13   | 0.17  |
| p-value <sup>(b)</sup> | –    | –     | 0.90    | 0.43  | 0.30   | 0.04  | 0.87   | 0.61  | 0.95   | 0.72  |

<sup>(a)</sup>: p values of the Shapiro-Wilk normality test;

<sup>(b)</sup>: p values of the two-sided Student's t-test for the ensemble mean comparison of the two-paired samples from CTRL and SENS experiments;

13 **Table S3. The bootstrap (nboot=10000) estimates (ensemble mean and 95% percentile**  
 14 **range) of positive extreme probabilities of the MCA\_Z500 and ECP\_PPI indices in the**  
 15 **WACCM experiments**

|          | CTRL | SENSall             | SENSr1             | SENSr2               | SENSr3              |
|----------|------|---------------------|--------------------|----------------------|---------------------|
| MCA_Z500 | 5.0% | 3.7%<br>(0-13.5%)   | 3.3%<br>(0-9.2%)   | 7.5%<br>(0.8-16.4%)  | 4.1%<br>(0-12.8%)   |
| ECP_PPI  | 5.0% | 7.0%<br>(0.7-16.1%) | 4.1%<br>(0.4-9.2%) | 11.6%<br>(5.2-18.4%) | 5.0%<br>(0.2-11.0%) |

16

17 **Table S4. The bootstrap (nboot=10000) estimates (ensemble mean and 95% percentile**  
18 **range) of positive extreme intensities of the MCA\_Z500 and ECP\_PPI indices in the**  
19 **WACCM experiments**

|          | CTRL                | SENSall             | SENSr1              | SENSr2              | SENSr3              |
|----------|---------------------|---------------------|---------------------|---------------------|---------------------|
| MCA_Z500 | 1.14<br>(0.75-1.72) | 1.00<br>(0.77-1.35) | 1.07<br>(0.81-1.44) | 1.27<br>(0.90-1.68) | 1.03<br>(0.77-1.41) |
| ECP_PPI  | 0.86<br>(0.63-1.40) | 0.91<br>(0.70-1.25) | 0.94<br>(0.72-1.31) | 1.12<br>(0.90-1.42) | 0.84<br>(0.66-1.13) |

20

21 **Table S5. Changes in ensemble mean values and probabilities of positive extreme values of**  
22 **ECP\_PPI in the CMIP6 models**

|                      | Time | NCEP  | CAMS-<br>CSM1-0 | CESM2 | CESM2-<br>WACCM | CanESM5 | EC-<br>Earth3 | GFDL-<br>CM4 | IPSL-<br>CM6A-<br>LR | MIROC6 |
|----------------------|------|-------|-----------------|-------|-----------------|---------|---------------|--------------|----------------------|--------|
| Mean                 | P1   | -0.38 | -0.36           | -0.07 | 0.03            | -0.02   | -0.27         | 0.06         | 0.12                 | 0.12   |
|                      | P2   | 0.30  | -0.16           | 0.20  | 0.36            | 0.10    | -0.21         | 0.14         | 0.08                 | 0.02   |
|                      | P3   | -     | -0.23           | 0.11  | 0.27            | 0.22    | -0.25         | 0.26         | 0.30                 | 0.00   |
| P <sub>extreme</sub> | P1   | 5%    | 5%              | 5%    | 5%              | 5%      | 5%            | 5%           | 5%                   | 5%     |
|                      | P2   | 19%   | 11%             | 11%   | 10%             | 7%      | 5%            | 6%           | 7%                   | 2%     |
|                      | P3   | -     | 13%             | 13%   | 6%              | 12%     | 2%            | 13%          | 11%                  | 4%     |

23

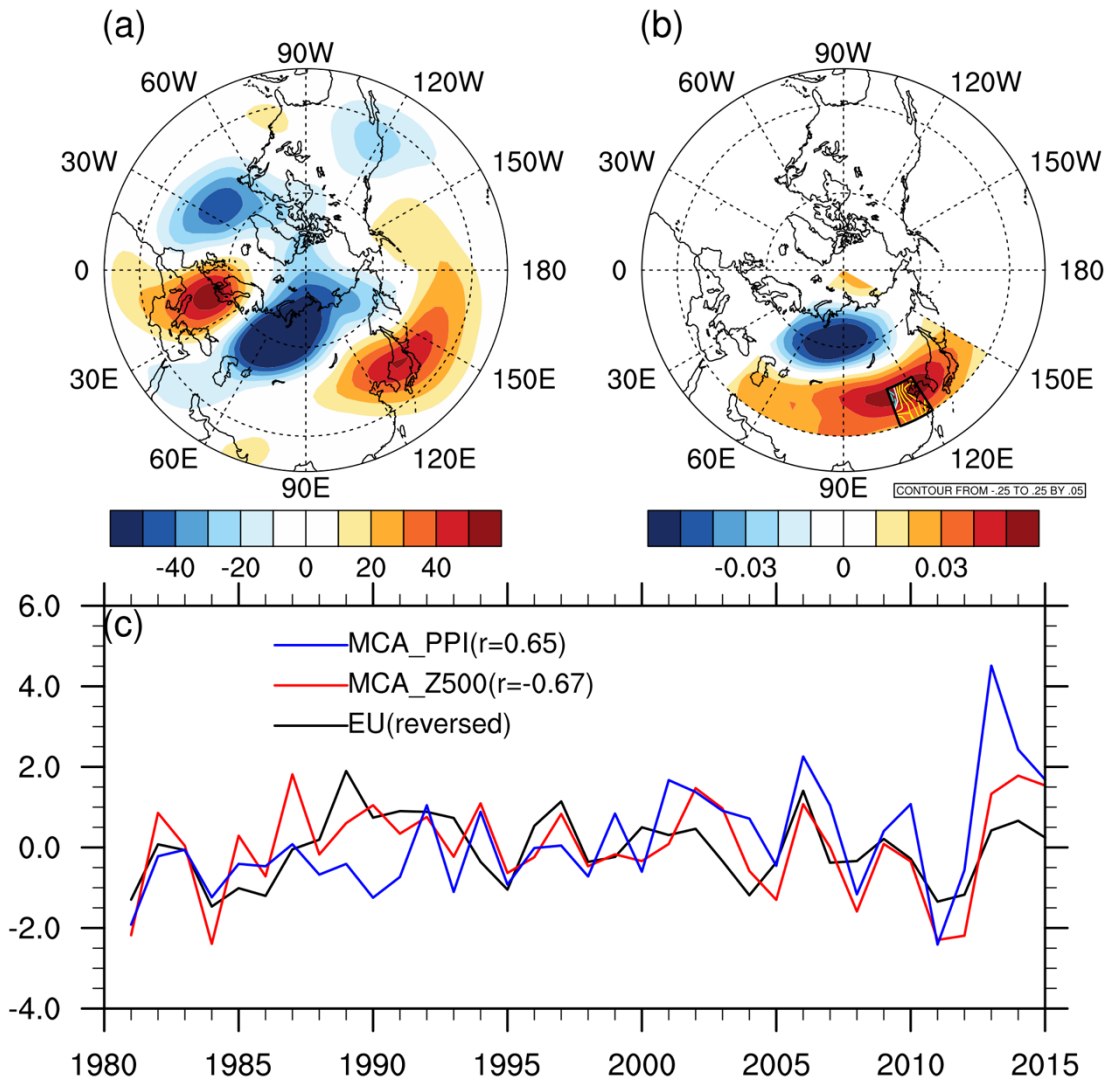

**Figure S1. Comparison of the circulation patterns related with regional air stagnation over ECP based on the NCEP reanalysis data. (a) spatial distribution of the EU pattern in negative phase (shading) in the 500 hPa geopotential height field (unit: m); (b) spatial distribution of the first modes of MCA\_Z500 in positive phase (shading) and MCA\_PPI in positive phase (contours with interval of 0.05; the yellow solid lines denote the positive contours; the white line denotes the zero contour; the cyan dashed lines denote the negative contours); the black box denotes the ECP region (112° E to 122° E, 30° N to 41° N); (c) time series of the two circulation patterns and the MCA\_PPI index in January from 1981 to 2015. The  $r$  value in the parentheses after the MCA\_PPI legend is the correlation coefficient between MCA\_PPI and MCA\_Z500. The  $r$  value in the parentheses after the MCA\_Z500 legend is the correlation coefficient between MCA\_Z500 and EU. The sign of the EU index is reversed for better comparison with the MCA\_Z500 index.**

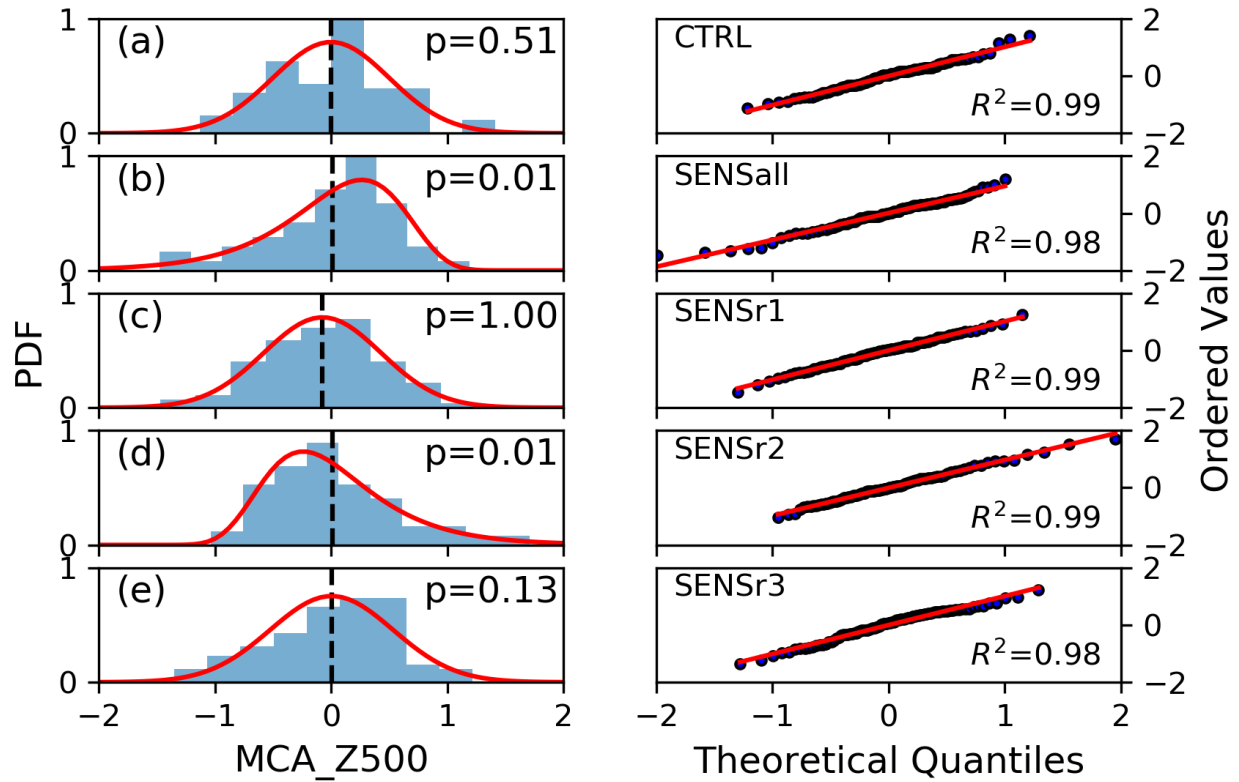

**Figure S2. Evaluation of the MCA\_Z500 distribution fitting in the WACCM experiments.** The left panels show the comparison of the histograms and fitted PDF curves of MCA\_Z500 in winter months (Dec, Jan, and Feb), and the right panels show the Q-Q plots by comparing the sample quantiles from the corresponding experiments against the theoretical ones of the distribution. The black dashed lines and p values in the left panel denote the ensemble means and the normality test results of each experiment, and the red lines and  $R^2$  values in the right panel denote the least-squares regression fits to the quantile data and their corresponding goodness-of-fit. The statistical properties in Table S2 and the histograms of each experiment suggest (a) a normal distribution in CTRL; (b) a left-skewed distribution with “changed symmetry” in SENSall; (c) a normal distribution with “increased variability” in SENSr1; (d) a right-skewed distribution with “changed symmetry” in SENSr2; (e) a normal distribution with “increased variability” in SENSr3.

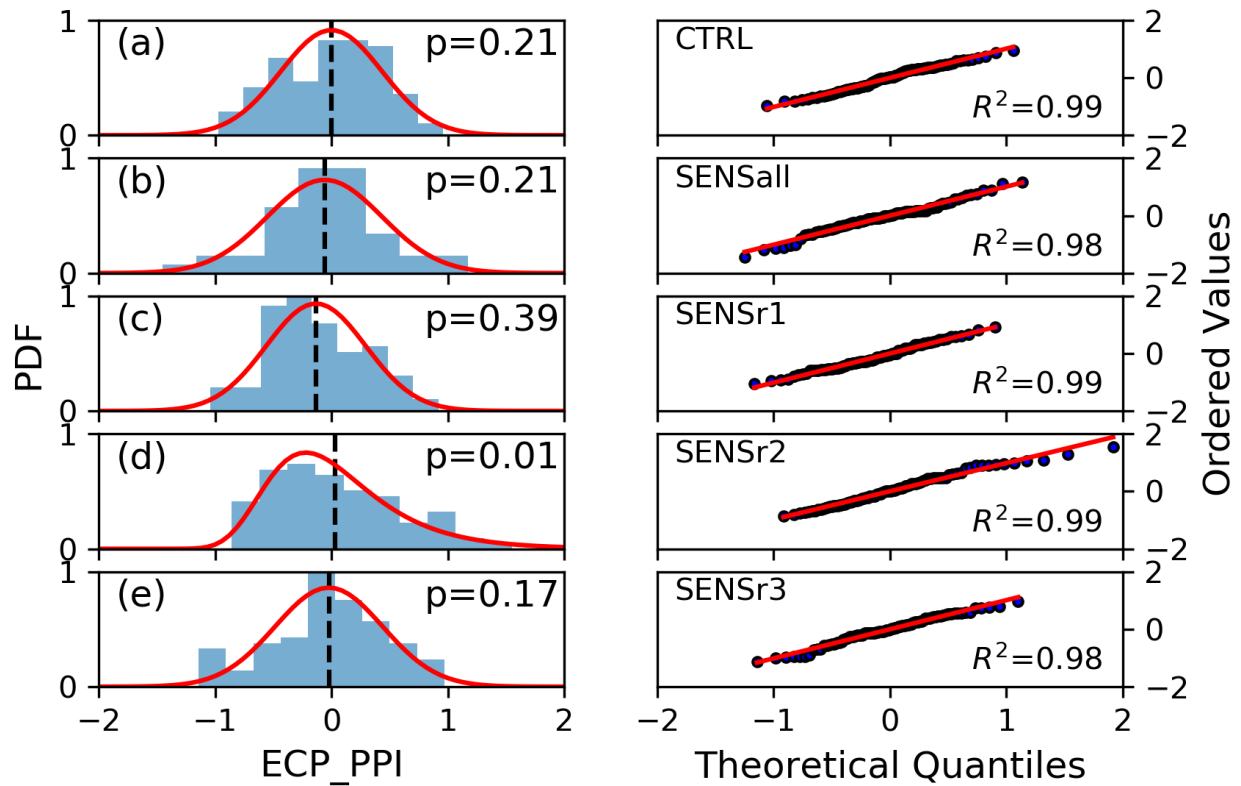

**Figure S3. Evaluation of the ECP\_PPI distribution fitting in the WACCM experiments.** The left panels show the comparison of the histograms and fitted PDF curves of ECP\_PPI in winter months (Dec, Jan, and Feb), and the right panels show the Q-Q plots by comparing the sample quantiles from the corresponding experiments against the theoretical ones of the distribution. The black dashed lines and p values in the left panel denote the ensemble means and the normality test results of each experiment, and the red lines and  $R^2$  values in the right panel denote the least-squares regression fits to the quantile data and their corresponding goodness-of-fit. The statistical properties in Table S2 and the histograms of each experiment suggest (a) a normal distribution in CTRL; (b) a normal distribution with “increased variability” in SENSa11; (c) a normal distribution with “shifted mean” in SENSr1; (d) a right-skewed distribution with “changed symmetry” in SENSr2; (e) a normal distribution with “increased variability” in SENSr3.

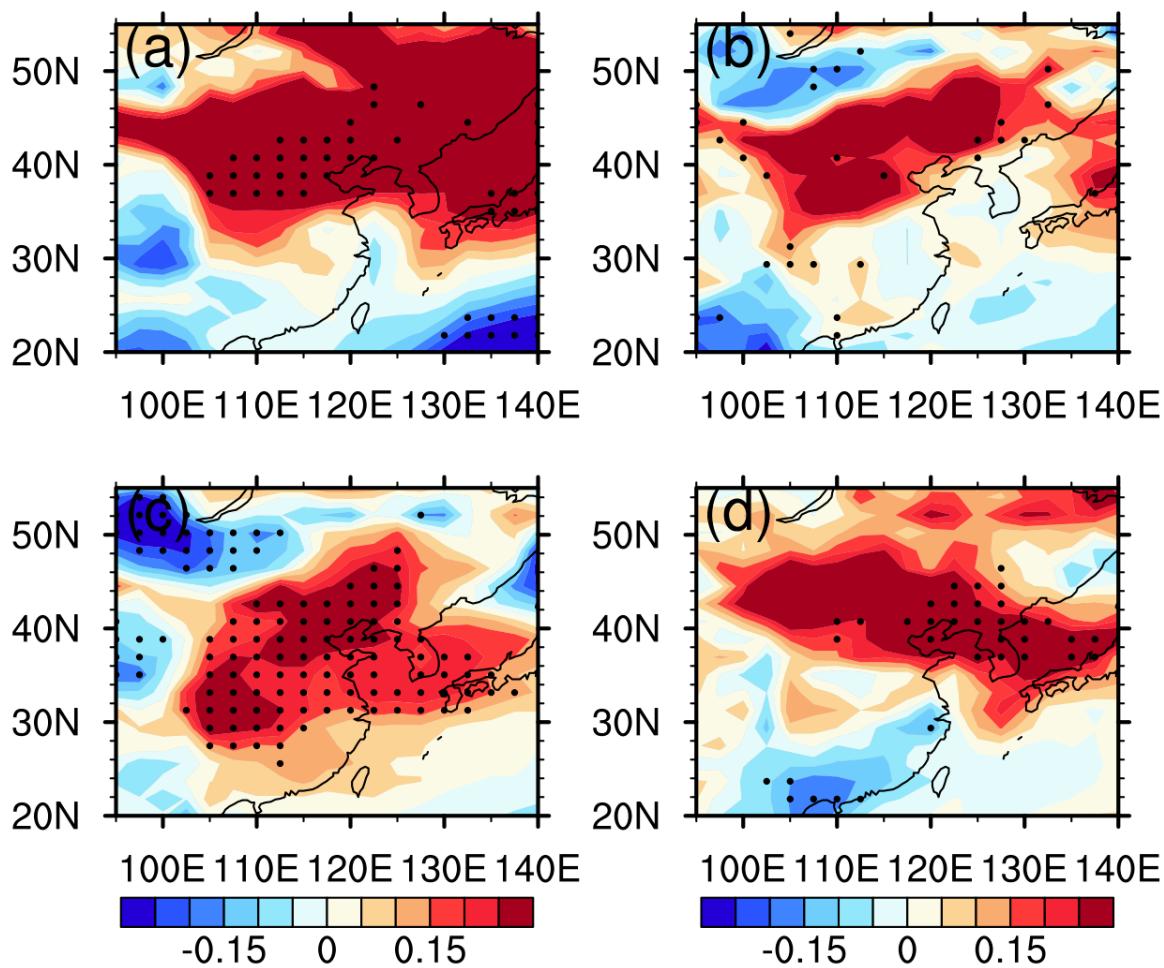

**Figure S4. Spatial distributions of surface  $PM_{2.5}$  concentration percentage changes (unit: 100%) in extreme members of each sensitivity experiment relative to the CTRL ensemble mean result. (a) SENSall; (b) SENSr1; (c) SENSr2; (d) SENSr3. The stipples denote the 0.05 significance level.**

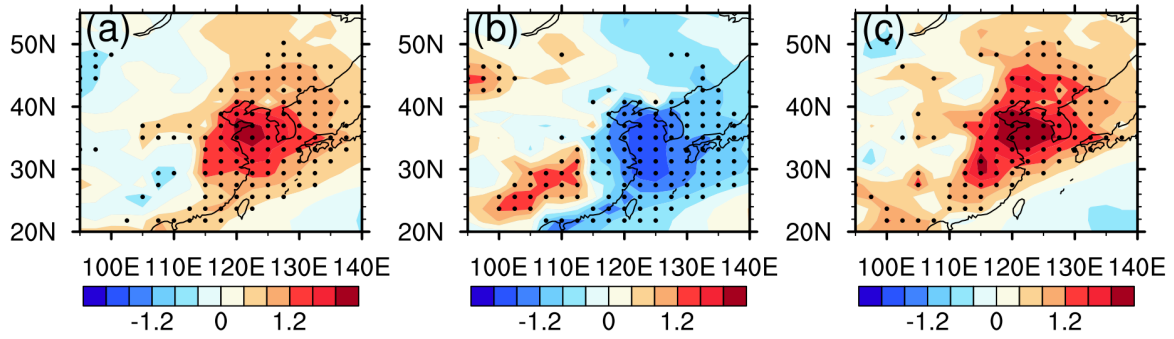

**Figure S5. Spatial distributions of regional ventilation condition changes (unitless) in the SENSr2 experiment. (a) PPI differences between SENSr2 extreme members and CTRL ensemble mean; (b) WSI differences between SENSr2 extreme members and CTRL ensemble mean; (c) ATGI differences between SENSr2 extreme members and CTRL ensemble mean. The stipples denote the 0.05 significance level.**

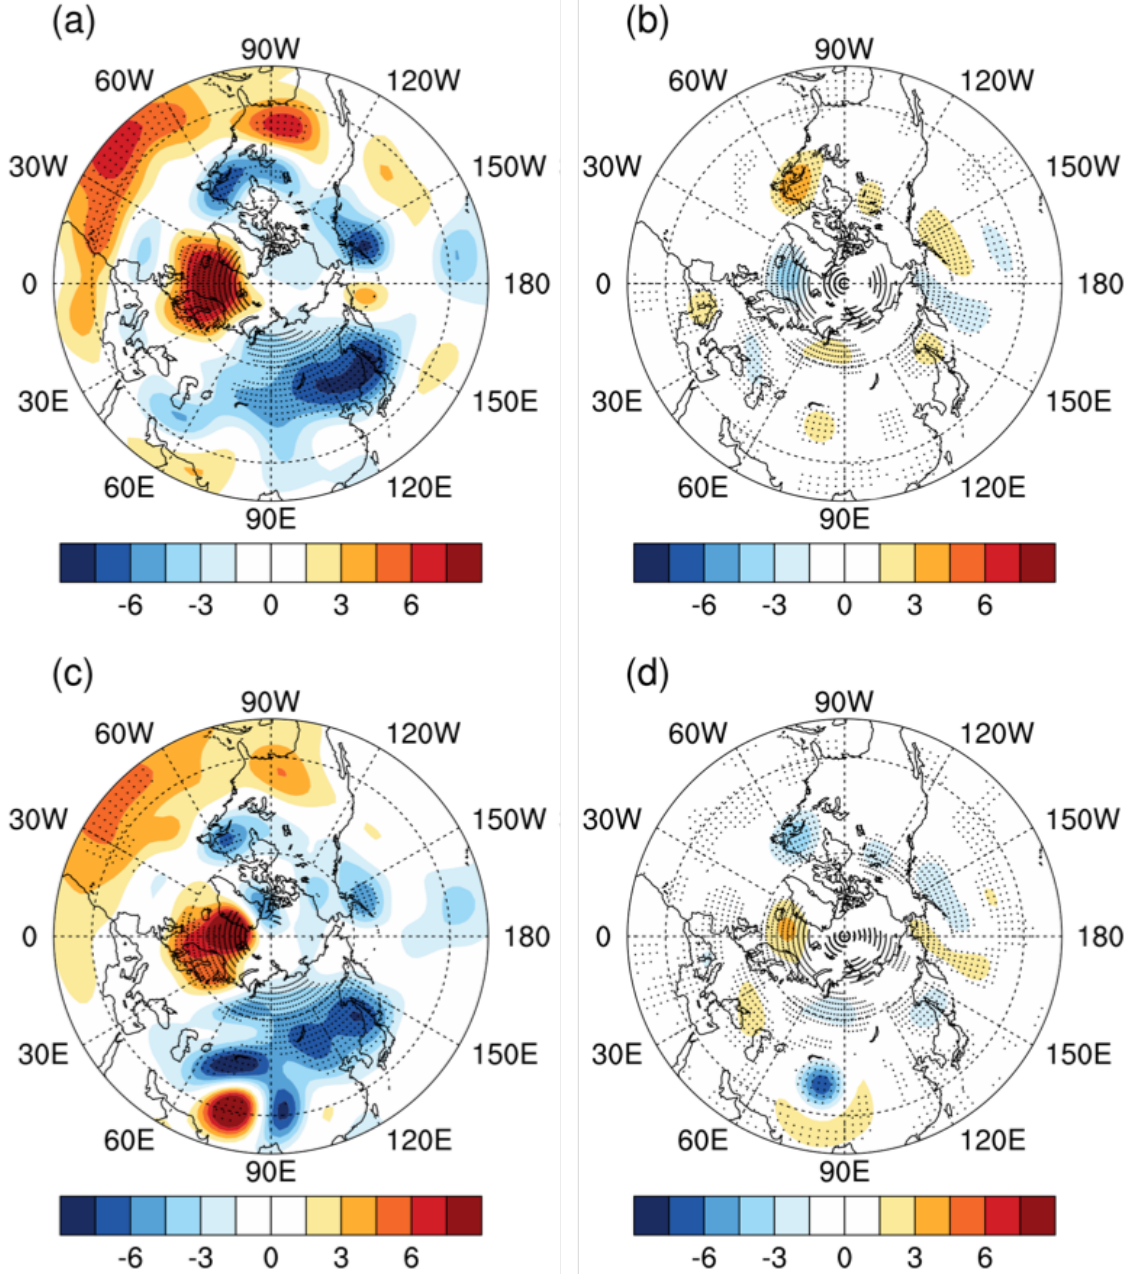

Figure S6. Comparison of geopotential height tendencies (unit: m/day) in the extreme members of WACCM SESN3 driven by (a) transient eddy vorticity forcing ( $Z_t^V$ ) in the upper troposphere at 250 hPa; (b) transient eddy heat forcing ( $Z_t^H$ ) at 250 hPa; (c) transient eddy vorticity forcing ( $Z_t^V$ ) in the lower troposphere at 850 hPa; (d) transient eddy heat forcing ( $Z_t^H$ ) at 850 hPa. The stipples denote the 0.05 significance level.



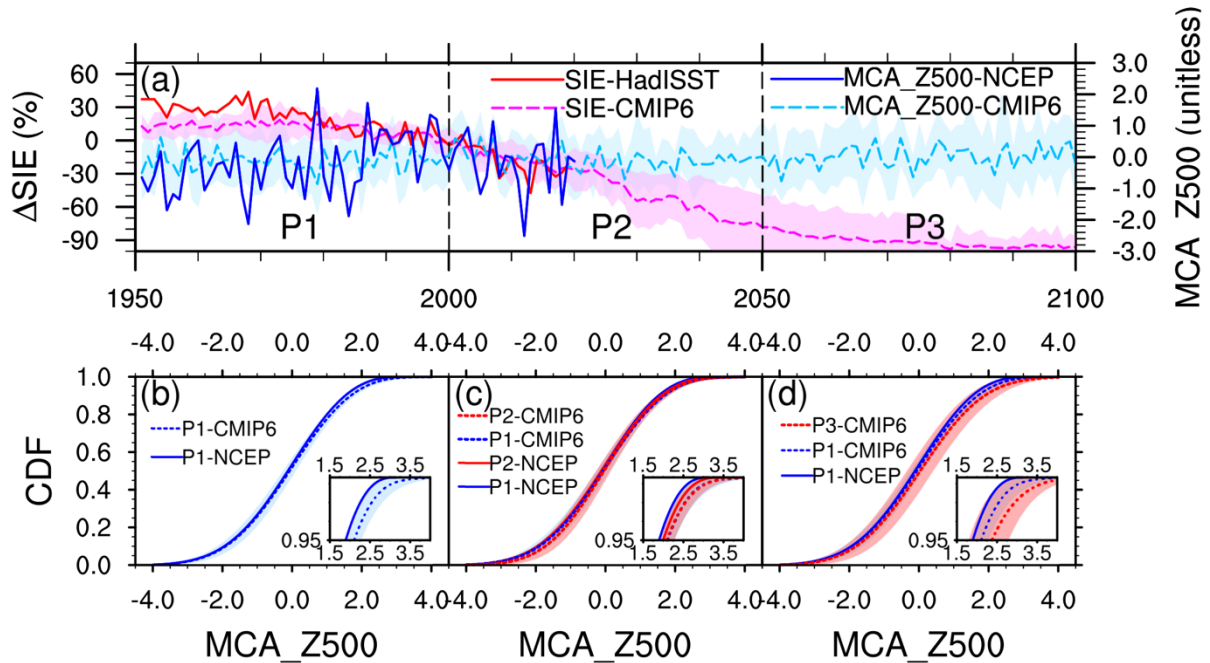

**Figure S8. Historical simulations and future projections (under the SSP5-8.5 scenario) of Arctic sea ice and regional circulation in observational and reanalysis data and CMIP6 models. (a) time series of the Arctic SIE relative changes (unit: %; relative to 1981-2010) in preceding September and MCA\_Z500 (unitless) in DJF of the following winter (using years of January for X-axis labeling). The solid lines denote observation- and reanalysis-based Arctic SIE and MCA\_Z500 from 1950 to 2019. The dashed lines denote ensemble mean and the color shading denotes  $\pm 1$  standard deviation of the 8 CMIP6 models (see Table S1 for model details) from 1950 to 2100. Note that the SIE time series were shifted forward by one year to align with the MCA\_Z500 data; (b) comparison of MCA\_Z500 CDF curves between the NCEP reanalysis data and the CMIP6 models in the P1 time period from 1951 to 2000. The inset denotes the distributions of positive extremes ( $\geq MCA\_Z500_{P1}^{95^{th}}$ ). The color shading denotes  $\pm 1$  standard deviations in the 8 CMIP6 models; (c) Same as (b) but for the comparison between P1 and P2 (2001-2050) time periods as well as between the NCEP reanalysis data and the CMIP6 models; (d) same as (b) but for the comparison between P1 and P3 (2051-2100) time periods as well as between the NCEP reanalysis data and the CMIP6 models.**

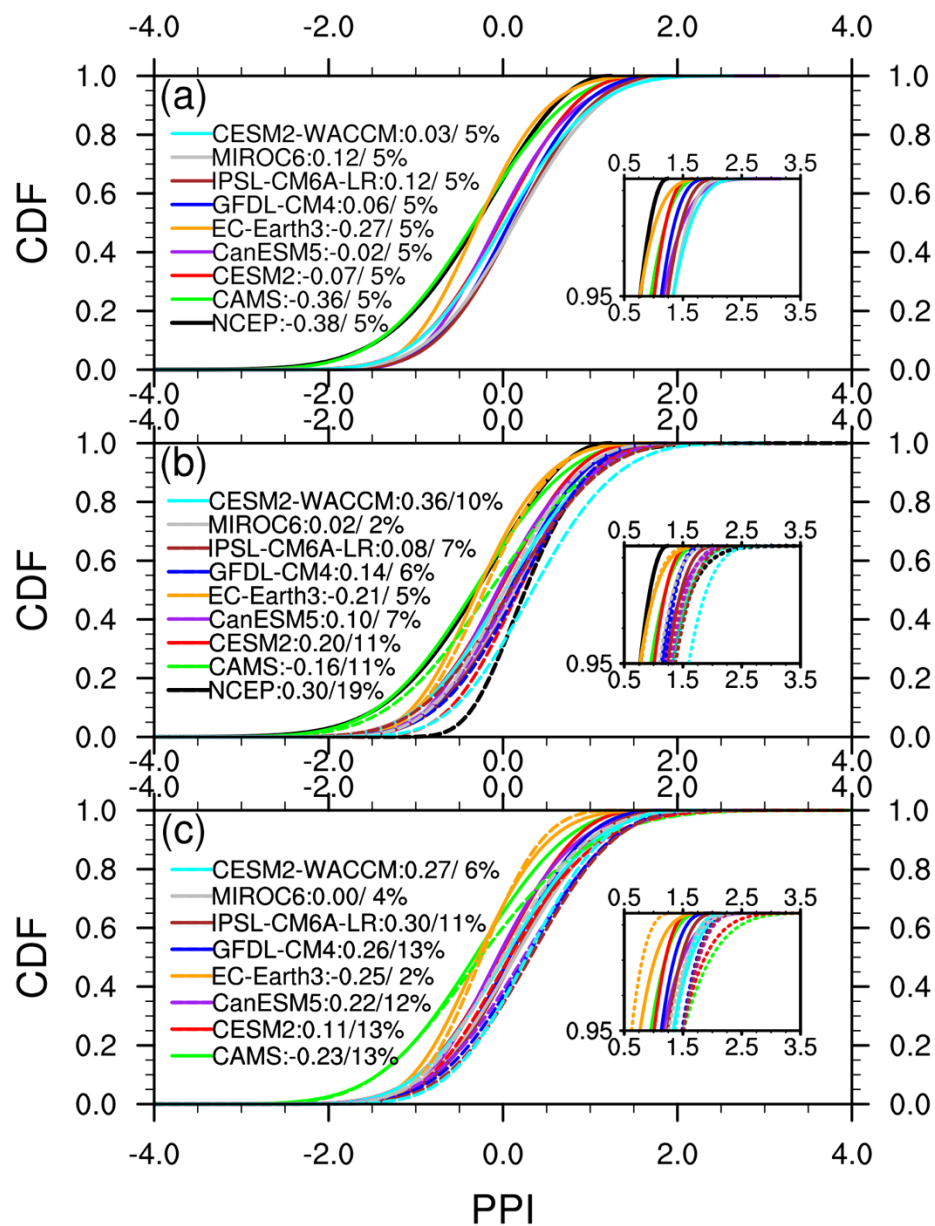

**Figure S9. Historical distribution and future projections (under the SSP5-8.5 scenario) of regional air stagnation in winter (DJF) in NCEP reanalysis and CMIP6 models. (a) CDFs of historical ECP\_PPI during the P1 period (1951-2000); (b) comparison of ECP\_PPI CDFs between historical (solid lines) and near-term projections (dashed lines) during the P2 period (2001-2050). The NCEP ECP\_PPI data in P2 are from 2001 to 2019; (c) comparison of ECP\_PPI CDFs between historical (solid lines) and long-term projections (dashed lines) during the P3 period (2051-2100). In (a)-(c), the numbers and percentages after each legend name denote ensemble mean values and probabilities of positive extreme values in P1-P3, respectively.**

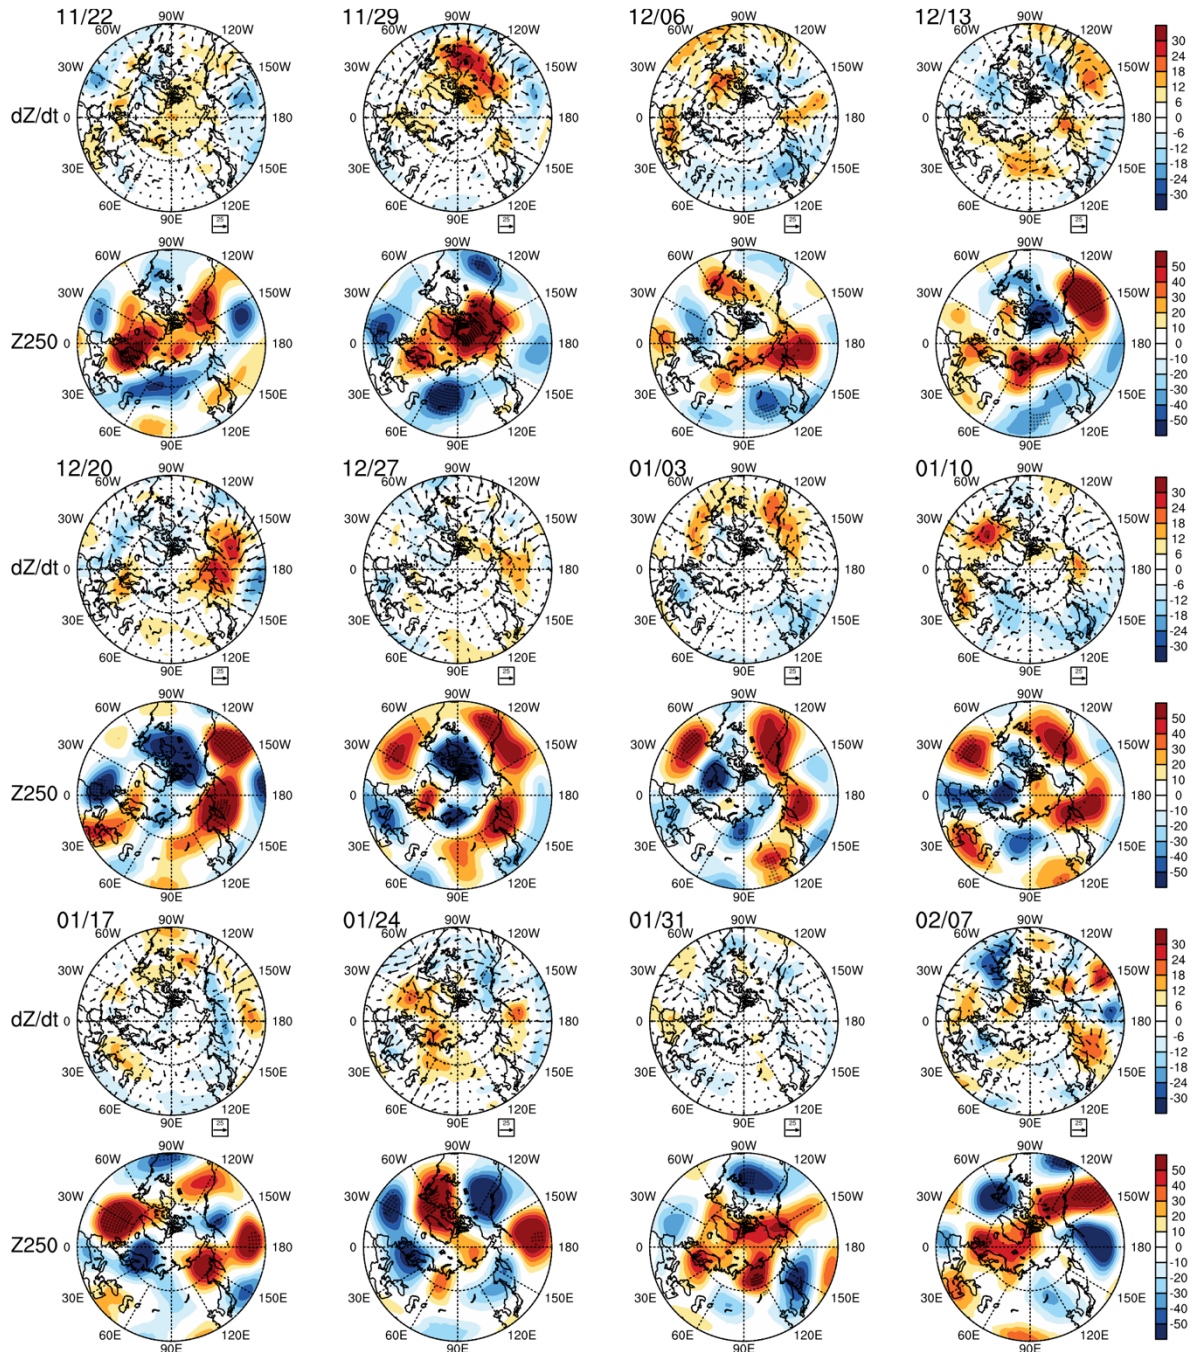

**Figure S10. Weekly evolution of E vectors (unit:  $\text{m}^2/\text{s}^2$ ), geopotential height tendencies (unit:  $\text{m}/\text{day}$ ), and height anomalies (unit:  $\text{m}$ ) at 250 hPa in SENSr2 ensemble mean. The dates on top left corners denote the first days of each week. The stipples in anomalous Z250 fields denote the 0.05 significance level.**

## References

- Boucher, O., Denvil, S., Caubel, A., et al.: IPSL-CM6A-LR model output prepared for CMIP6 CMIP historical. **Version 20180803**. Earth System Grid Federation. <http://doi.org/10.22033/ESGF/CMIP6.5195>, 2018.
- Boucher, O., Denvil, S., Caubel, A., et al.: IPSL-CM6A-LR model output prepared for CMIP6 ScenarioMIP ssp585. **Version 20190119**. Earth System Grid Federation. <http://doi.org/10.22033/ESGF/CMIP6.5271>, 2019.
- CCCma: CCCma CanESM5 model output prepared for CMIP6 CMIP historical. **Version 20190429**. Earth System Grid Federation. <http://cera-www.dkrz.de/WDCC/meta/CMIP6/CMIP6.CMIP.CCCma.CanESM5.historical>, 2018.
- CCCma: CCCma CanESM5 model output prepared for CMIP6 ScenarioMIP ssp585. **Version 20190429**. Earth System Grid Federation. <http://cera-www.dkrz.de/WDCC/meta/CMIP6/CMIP6.ScenarioMIP.CCCma.CanESM5.ssp585>, 2018.
- Danabasoglu, G., Lawrence, D., Lindsay, K., et al.: NCAR CESM2 model output prepared for CMIP6 CMIP historical. **Version 20190308**. Earth System Grid Federation. <http://doi.org/10.22033/ESGF/CMIP6.7627>, 2019.
- Danabasoglu, Gokhan: NCAR CESM2 model output prepared for CMIP6 ScenarioMIP ssp585. **Version 20190730**. Earth System Grid Federation. <http://doi.org/10.22033/ESGF/CMIP6.7768>, 2019.
- Danabasoglu, Gokhan: NCAR CESM2-WACCM model output prepared for CMIP6 CMIP historical. **Version 20190227**. Earth System Grid Federation. <http://doi.org/10.22033/ESGF/CMIP6.10071>, 2019.
- Danabasoglu, Gokhan: NCAR CESM2-WACCM model output prepared for CMIP6 ScenarioMIP ssp585. **Version 20190815**. Earth System Grid Federation. <http://doi.org/10.22033/ESGF/CMIP6.10115>, 2019.
- EC-Earth Consortium (EC-Earth): EC-Earth-Consortium EC-Earth3-Veg model output prepared for CMIP6 CMIP historical. **Version 20190605**. Earth System Grid Federation. <http://doi.org/10.22033/ESGF/CMIP6.4706>, 2019.
- EC-Earth Consortium (EC-Earth): EC-Earth-Consortium EC-Earth3-Veg model output prepared for CMIP6 ScenarioMIP ssp585. **Version 20190629**. Earth System Grid Federation. <http://doi.org/10.22033/ESGF/CMIP6.4914>, 2019.
- Guo, H., John, J.G., Blanton, C., et al.: NOAA-GFDL GFDL-CM4 model output prepared for CMIP6 CMIP historical. **Version 20180701**. Earth System Grid Federation. <http://doi.org/10.22033/ESGF/CMIP6.8594>, 2018.
- Guo, H., John, J.G., Blanton, C., et al.: NOAA-GFDL GFDL-CM4 model output prepared for CMIP6 ScenarioMIP ssp585. **Version 20180701**. Earth System Grid Federation. <http://doi.org/10.22033/ESGF/CMIP6.9268>, 2018.
- Rong, X.: CAMS CAMS\_CSM1.0 model output prepared for CMIP6 CMIP historical. **Version 20190708**. Earth System Grid Federation. <http://doi.org/10.22033/ESGF/CMIP6.9754>, 2019.
- Rong, X.: CAMS CAMS\_CSM1.0 model output prepared for CMIP6 ScenarioMIP ssp585. **Version 20190708**. Earth System Grid Federation. <http://doi.org/10.22033/ESGF/CMIP6.11052>, 2019.

176 Shiogama, H., Abe, M., Tatebe, H., et al.: MIROC MIROC6 model output prepared for CMIP6  
177 ScenarioMIP ssp585. **Version 20190627**. Earth System Grid Federation.  
178 <http://doi.org/10.22033/ESGF/CMIP6.5771>, 2019  
179 Tatebe, H. and Watanabe, M.: MIROC MIROC6 model output prepared for CMIP6 CMIP  
180 historical. **Version 20181212**. Earth System Grid Federation.  
181 <http://doi.org/10.22033/ESGF/CMIP6.5603>, 2018
